# Supplementary material for: Desmoplasia and oncogene driven acinar-to-ductal metaplasia are concurrent events during acinar cell-derived pancreatic cancer initiation in young adult mice
Source: PubMed Central journal article supplement (PMC6731019; doi:10.1371/journal.pone.0221810), 2019-09-06
Supplement: pone.0221810.s003.pdf [file pone.0221810.s003.pdf]

## S1 table. RNA-Seq quality control data analyzes

| Sample I.D.        | RIN | Total_Reads | Overall_Mapping% | Multi_Align% | Exonic_Read_Counts | Exonic% |
|--------------------|-----|-------------|------------------|--------------|--------------------|---------|
| 1. Normal pancreas | 7   | 54713579    | 90.1             | 33.3         | 29656140           | 60.1    |
| 2. Normal pancreas | 7.7 | 51163117    | 91.5             | 34           | 27630333           | 59      |
| 3. Normal pancreas | 6.9 | 53700967    | 86.5             | 34.2         | 26697504           | 57.4    |
| 4. ADM             | 6.2 | 51971440    | 90.5             | 9.2          | 25701289           | 54.6    |
| 5. ADM             | 5.8 | 51266351    | 89.9             | 9.7          | 23903780           | 51.8    |
| 6. ADM             | 7.4 | 55271381    | 89.7             | 8.1          | 27482854           | 55.4    |
| 7. PDAC            | 8.7 | 51520029    | 91.6             | 7.3          | 28838890           | 61.1    |
| 8. PDAC            | 7.5 | 54021906    | 92.8             | 6.8          | 28946686           | 57.7    |
| 9. PDAC            | 9.1 | 55337629    | 91.5             | 7.5          | 31315456           | 61.8    |

RIN (RNA integrity number) was used as a metric to assess RNA quality. RIN>5 was considerable suitable for the analysis, considering the challenges involving extraction of high-quality RNA by LCM from pancreatic tissues. Alignment statistics shows good alignment rate (~90%>) for all samples, with satisfactory percentage of mapped reads at exons (~50-60%).
