# Supplementary material for: Desmoplasia and oncogene driven acinar-to-ductal metaplasia are concurrent events during acinar cell-derived pancreatic cancer initiation in young adult mice
Source: PubMed Central journal article supplement (PMC6731019; doi:10.1371/journal.pone.0221810), 2019-09-06
Supplement: pone.0221810.s004.pdf [file pone.0221810.s004.pdf]

**S2 Table. *Kras* and *Trp53* Mutational analyzes to confirm that transcriptomics were performed on true lesions**

| <b><i>Trp53:c.G809A:p.R270H</i></b> | Chromosome 11 | REF | ALT | Alt. Allele Freq |
|-------------------------------------|---------------|-----|-----|------------------|
|                                     | Pos 69589608  | G   | A   |                  |
| 1. Normal pancreas                  |               | 2   | 0   | 0.00%            |
| 2. Normal pancreas                  |               | 0   | 0   | NA               |
| 3. Normal pancreas                  |               | 4   | 0   | 0.00%            |
| 4. ADM                              |               | 39  | 8   | 17.02%           |
| 5. ADM                              |               | 20  | 13  | 39.39%           |
| 6. ADM                              |               | 56  | 14  | 20.00%           |
| 7. PDAC                             |               | 4   | 1   | 20.00%           |
| 8. PDAC                             |               | 10  | 35  | 77.78%           |
| 9. PDAC                             |               | 20  | 96  | 90.57%           |

| <b><i>Kras:c.G35A:p.G12D</i></b> | Chromosome 6  | REF | ALT | Alt. Allele Freq |
|----------------------------------|---------------|-----|-----|------------------|
|                                  | Pos 145246771 | C   | T   |                  |
| 1. Normal pancreas               |               | 0   | 0   | NA               |
| 2. Normal pancreas               |               | 0   | 0   | NA               |
| 3. Normal pancreas               |               | 0   | 0   | NA               |
| 4. ADM                           |               | 3   | 2   | 40.00%           |
| 5. ADM                           |               | 1   | 13  | 92.86%           |
| 6. ADM                           |               | 4   | 9   | 69.23%           |
| 7. PDAC                          |               | 4   | 3   | 42.86%           |
| 8. PDAC                          |               | 4   | 1   | 20.00%           |
| 9. PDAC                          |               | 7   | 14  | 66.67%           |

To confirm whether LCM microdissected ADM and PDAC lesions expresses mutant *Trp53R270* and *KrasG12D*, and therefore are true lesions, abundance of cDNA fragments which contain the oncogenic point mutations relative to the abundance of cDNA which encodes for wildtype *Trp53* and *Kras* sequences in ADM and PDAC samples were measured and compared to normal pancreas. As expected, *Trp53R270H* and *KrasG12D* mutations (top and bottom table, respectively) are present in the ADM/PDAC subsets, but were not detected in the healthy pancreas samples. Methodology: Samtools was used to compile a table of nucleotide base coverage for R270H in *Trp53* and G12D in *Kras* for each sample. An in-house program written in C++ was used to collect the depth of each allele and calculate the alternative allele frequency.
